# Supplementary material
Source: Research Square preprint supplement (doi:10.21203/rs.3.rs-9503143/v1)
Supplement: Supplementary file 1 [file 41fa26d65fdccbeb5c4f861c.xlsx]

## Sheet: Sheet1
	Collection	Cutoff	N	Ns	Dec	Inc	k	a95	S	R	K	A95	A95min	A95max	ΔDx	ΔIx	λ	PLong	PLat	Latitude	Longitude
	In situ
1	Otamura Fm. 1	45	85	89	333.29	32.64	33.51	2.69	12.74	82.49	40.99	2.43	2.03	4.99	2.55	3.79	17.76	14.03	58.62	43.1592	145.108
1	Sill into Otamura Fm.	45	21	21	327.48	42.7	52.69	4.42	11.97	20.62	46.57	4.71	3.55	12.05	5.19	6.17	24.77	31.7	57.9
2	Otamura Fm. 2*	45	18	18	341.38	46.43	121.05	3.15	7.52	17.86	116.34	3.22	3.78	13.27	3.64	3.9	27.72	15.95	68.52	43.388	145.73
3	Nokkamappu Fm. Sedimentary series	45	81	89	307.57	26.19	16.13	4.04	18.4	76.04	19.77	3.63	2.07	5.15	3.74	6.2	13.81	39.89	38.25	43.3793	145.641
3	Nokkamappu Fm. Sedimentary series	NO	89	89	308.49	27.55	8	5.67	30.19	77.99	8.41	5.51	1.99	4.85	5.69	9.24	14.62	39.89	38.25
3	Nokkamappu Fm. Sedimentary series**	45	111	120	308.02	24.04	18.13	3.24	17.29	104.93	22.37	2.9	1.82	4.22	2.97	5.08	12.57	37.79	37.49
3	Nokkamappu Conglomerate Blocks #1	45	5	7	182.12	48.17	6.99	31.14	34.67	4.43	5.64	35.34	6.3	29.75	41.5	41.24	29.19	136.36	-0.55
3	Nokkamappu Conglomerate Blocks #1	NO	7	7	223.79	75.82	4.62	31.51	55.38	5.7	2.35	51.04	5.51	24.07		30.11	63.19	131.65	24.48
3	Nokkamappu Conglomerate Blocks #2	45	3	9	11.37	1.62	4.39	67.75	23.75	2.54	11.78	37.65	7.73	41.04	37.65	75.25	0.81	238.24	75.73
3	Nokkamappu Conglomerate Blocks #2	NO	9	9	11.62	36.71	1.4	77.56	80.67	3.3	1.36	81.33	4.98	20.54		119.07	20.44	294.68	69.6
3	Nokkamappu Fm. Sedimentary series***	45	18	23	313.8	62.73	19.66	8	24.71	17.14	11.01	10.91	3.78	13.27	15.29	8.89	44.13	104.07	60.87
3	Nokkamappu Fm. Sedimentary series***	NO	23	23	321.24	72.56	8.52	11.02	42	20.42	4.2	16.86	3.42	11.37	33.04	10.71	57.85	104.07	60.87
3	Nokkamappu Fm. Pillow Lavas	45	54	56	313.08	45.87	21.61	4.26	16.99	51.55	23.14	4.11	2.43	6.64	4.63	5.05	27.26	51.12	50.2
4	Nosappu cape intrusion and lava	45	42	44	331.66	51.5	22.15	4.79	20.86	40.15	15.41	5.8	2.69	7.78	6.86	6.28	32.15	45.88	65.41	46.36	145.7
4	Nosappu cape intrusion and lava Averages	45	8	9	332.63	68.51	21.12	12.33	23.99	7.67	11.65	16.93	5.22	22.12	28.08	11.88	51.78	108.04	69.08
	Tilt Corrected
1	Otamura Fm. 1	45	84	89	325.1	50.42	35.8	2.74	14.84	81.68	30.02	2.86	2.04	5.03	3.34	3.17	31.17	47.19	63.45	43.1592	145.108
1	Otamura Fm. 1 $§	45	84	89	325.1	53.17	37.98	2.54	14.8	81.81	30.36	2.85	2.04	5.03	3.43	2.96	33.73	47.92	61.31
1	Sill into Otamura Fm. §	45	21	21	313.25	59.33	52.69	4.42	14.83	20.62	30.39	5.86	3.55	12.05	7.68	5.22	40.14	67.58	55.67
2	Otamura Fm. 2*	45	18	18	310.79	61.71	121.05	3.15	9.71	17.86	69.89	4.16	3.78	13.27	5.69	3.49	42.89	73.16	54.68	43.388	145.73
3	Nokkamappu Fm. Sedimentary series	45	79	89	301.27	41.1	16.57	4.04	20.67	74.29	15.69	4.16	2.09	5.23	4.53	5.62	23.56	55.67	40.34	43.3793	145.641
3	Nokkamappu Fm. Sedimentary series$§	45	78	89	325.11	59.58	26.74	3.16	19.37	75.12	17.78	3.91	2.1	5.27	5.14	3.46	40.42	61.24	64.05
3	Nokkamappu Fm. Sedimentary series	NO	89	89	301.75	43.05	7.93	5.69	33.55	77.9	6.84	6.2	1.99	4.85	6.85	8.07	25.03	55.67	40.34
3	Nokkamappu Fm. Sedimentary series**	45	109	120	302.84	40.82	19.03	3.19	19.42	103.33	17.76	3.3	1.84	4.27	3.6	4.49	23.36	53.35	41.16
3	Nokkamappu Conglomerate Blocks #1	45	5	7	182.12	48.17	6.99	31.14	34.67	4.43	5.64	35.34	6.3	29.75	41.5	41.24	29.19	136.36	-0.55
3	Nokkamappu Conglomerate Blocks #1	NO	7	7	195.87	58.85	4.62	31.51	51.31	5.7	2.79	44.54	5.51	24.07	65.56	40.15	39.6	136.36	-0.55
3	Nokkamappu Conglomerate Blocks #2	45	3	9	11.37	1.62	4.39	67.75	23.75	2.54	11.78	37.65	7.73	41.04	37.65	75.25	0.81	238.24	75.73
3	Nokkamappu Conglomerate Blocks #2	NO	9	9	18.9	55.53	1.4	77.56	82.84	3.3	1.23	100.34	4.98	20.54		98.39	36.06	238.24	75.73
3	Nokkamappu Fm. Sedimentary series***	45	17	23	289.24	86.33	24.15	7.41	29.79	16.34	7.64	13.82	3.86	13.76		6.99	82.69	149.9	39.73
3	Nokkamappu Fm. Sedimentary series***	NO	23	23	130.64	85.38	8.52	11.02	41.59	20.42	4.1	17.14	3.42	11.37		8.73	80.83	149.9	39.73
3	Nokkamappu Fm. Pillow Lavas §	45	53	56	291.38	59.18	26.51	3.87	19.01	51.04	18.5	4.67	2.45	6.72	6.1	4.17	39.97	79.34	40.69
4	Nosappu cape intrusion and lava §	45	40	44	327.74	70.75	31.48	4.09	21.9	38.76	13.96	6.28	2.74	8.03	11.01	4.16	55.07	108.13	64.82	46.36	145.7
4	Nosappu cape intrusion and lava Averages	NO	9	9	332	71.8	17.82	15.5	28.2	8.55	17.9	18.7	5	20.54	35.75	12	56.7	96.87	69.96
	(1) HN; (2) NE5: (3) NE2, N8, NM; (4) NE1, NE2, NE3, N4, N6, NE7, NE9
	* Single spot reading
	** including remagnetization circles
	*** Up component
	$ Inclination shallowing corrected
	§ Used as poles
	Untrustworthy values marked in red
