# Supplementary material
Source: Research Square preprint supplement (doi:10.21203/rs.3.rs-9503143/v1)
Supplement: Supplementary file 2 [file 509770adecf6cafbcc4f3219.docx]

Ultrafast plate and trench motions reveals weak mantle below the NW Pacific

*Daniel Pastor Galán1,2, Bram Vaes3,4, Lydian M. Boschman5, Arwen F. Deuss5, Stefania D.M. Wagenaar6, Alissa J. Kotowski5, Naoto Hirano7,8 & Douwe J.J. van Hinsbergen5*

1Instituto de Geociencias, Consejo Superior de Investigaciones Científicas (CSIC), Spain

2Frontier Research Institute for Interdisciplinary Sciences, Tohoku University, Japan

3Department of Earth and Environmental Sciences, Università degli Studi di Milano-Bicocca, Italy

4Aix-Marseille Université, CNRS, IRD, INRAE, CEREGE, Aix-en-Provence, France

5Department of Earth Sciences, Utrecht University, The Netherlands

6Institute of Geosciences, University of Potsdam, Germany

7Center for North East Asian Studies, Tohoku University, Japan

8Deparment of Earth Sciences, Tohoku University, Japan

## GEOLOGICAL BACKGROUND

The Nemuro Group is a Campanian–Paleocene sedimentary sequence, the oldest rocks of the Kuril Arc in East Hokkaido, northern Japan. The Nemuro Group has been interpreted as a forearc basin sedimentary sequence with a thickness of up to 3000 m and it has been subdivided in several informal formations1,2. It is a marine clastic sequence mostly composed of hemipelagic mudstone, turbidites, and submarine slump deposits. The group is unconformably overlain by the Eocene Urahoro Group. The group contains volcanic and subvolcanic rocks (sills), and most sedimentary rocks contain clasts derived from igneous rocks1. In this paper we have sampled the two lowermost the sedimentary formations: the Nokkamappu and Otamura formations. We have also sampled several igneous rocks including a section of basaltic pillow lavas within the Nokkamappu formation, Shoshonitic sills with Ar-Ar ages ~70 Ma3 intruding both Nokkamappu and Otamura formations and Paleocene adakitic lavas and sills in the Nosappu cape.

The Nokkamappu Formation comprises tuff breccia, volcanic conglomerate, volcanic sandstone, tuffaceous siltstone, and pillow lavas of basaltic and andesitic composition3. Biostratigraphic ages constrained the age of the formation to 77 to 70.6 Ma and the fossil association suggests shallow marine environments2,3. The Otamura Formation is mainly composed of hemipelagic mudstone and thinly bedded turbiditic sandstone (with negligible quartz) with minor lavas (olivine and clinopyroxene basalts). This formation is intruded by shoshonitic sills that yielded ages of 70.99 ± 0.87 and 71.9 ± 1.1 Ma3.

## Extended Results

Here we show a full description of the results per locality and lithology. The summary of the results is in the supplementary tables ST-1 (locality-wise), ST-2 (component-wise). EDF 1 shows a simplified geology and geography of the sampled Nemuro peninsula. All data can be found in the paleomagnetism and MagIC databases.

#### Shoshonitic rocks

###### Nokkamappu FM. Pillow Lavas (NM;43°23'02"N, 145°38'42"E)

We collected cores in 50 individual pillow-lavas from one flow. We isolated an up and SE directed component present in most samples (NM-Pillow-R), and in six samples a poorly defined NW down component (NM-Pillow-N), that was discarded because its concentration parameter (k) = 2.9 and after discarding two samples with a 45 cutoff the parameters still do not fulfill Deenen criteria: n = 4, k = 8.3 and and A95 (36) > Amax (34.2). NM-Pillow-R directions were generally isolated between 4 and 60 mT and 200 ºC and 580 ºC, although in some cases it followed the same trend from 0 to 100 mT and 20 to 580 ºC (Supplementary Fig. 2). NM pillow lavas show a k < 50, show a close to circular VGP projection (Supplementary Fig. 3) and pass Deenen et al.4 criteria.

###### SILL into OTAMURA FM (HN; 43º09'33"N, 145º06'30"E)

We collected 10 samples and identified two distinct components. The first one (tagged HN-Sill-N) shows a NW declination and pointing down that directs towards the origin. It was was isolated between 200 ºC and 580 ºC and between 4 and 26 mT and we interpret that it is carried by (Ti)magnetite (EDF-2). This component (HN-Sill-N) is consistent with a spot reading of the magnetic field (k / K = 95 / 94). We identify a second component (HN-Sill-R), opposite to the previous (SE declinations and up), only in samples demagnetized with AF (isolated between 30 to 60 mT). The component HN-Sill-R does not represent a single spot reading and shows slightly higher inclinations than HN-Sill-N (EDF 3). This supports a cooling slow enough to characterize the ancient geomagnetic field. When both components are combined the statistical parameters fit with a proper average of the magnetic field (Circular VGP, K < 50 and A95 within Deenen criteria).

###### SILL MR (43º08'56"N, 145º13'54"E)

We collected 10 samples. This site provided a low T and low coercivity component compatible with present day GAD for the site (Dec. / Inc. = 15.26º/ 57.13º, k/K = 17.07 / 11.09, a95 / A95 = 12.04 / 15.18). We did not consider this sill for further paleomagnetic analyses.

#### Adakitic Rocks

###### Ne4 - Sill (43°23'17"N, 145°43'48.65"E)

From the 10 samples collected we could obtain only two interpretable specimens one pointing NW-down and the other of Up-SE direction.

###### NE6 - Sill (43°23'20"N, 145°46'58"E)

We collected 13 samples that provided a single component (NE6-Sill) with SE declination and pointing up that directs towards the origin that represents a spot reading of the magnetic field (k / K = 295 / 311). The component was isolated between 300 ºC and 580 ºC (thermal) and 4 and 60 mT (AF).

###### NE7 - Sill (43°22'58"N, 145°48'52.72"E)

From the 8 samples collected, we identified a single component (NE7-Sill) with NNW declination and pointing down that directs towards the origin and was isolated between 4 and 60 mT. identical to the one observed in thermal demagnetization. NE7-Sill is consistent with a spot reading of the magnetic field (k / K = 113 / 71).

###### NE9- Sill (43°21'17"N, 145°47'06"E)

We identified a component (NE9-Sill-N) with NNW declination and pointing down that directs towards the origin and was isolated between 4 and 60 mT and 300 ºC and 580 ºC. This component (labeled) is consistent with a spot reading of the magnetic field (k / K = 113 / 71).

###### Lava flowS NE1 (43°22'15"N, 145°38'00"E), NE2 (43°22'29"N, 145°38'21"E) and NE 3 (43°16'48"N, 145°35'16.8"E)

Seven samples from NE1 lava flow show a single component (NE1Lava) with SE declination and up. This component is consistent with a spot reading of the magnetic field (k / K = 167 / 156). The 3 samples from NE2 lava flows show a paleomagnetic component (NE2-R-Lava) pointing almost upwards (slightly to the SE) not consistent with a single spot reading (k / K = 23 / 10). From NE3 we could recover 2 directions from a lava flow (NE3-Lava-R) and two directions from two pillow lavas in a different flow (NE3-Pillow-R), they are pointing up and SE. All these components were isolated between 4 and 60 mT and 200 ºC and 580 ºC.

##### Mean Adakitic rocks pole: Nossapu cape intrussion and lavas (NE1-NE2, NE3, NE4, NE6, NE7, NE9)

We have combined the NE lava flows and the adakitic sills to create a locality-pole. We have considered both the average of each site and the average of all specimens together. The resulting direction is nearly identical (see Supplementary Table ST1). Both versions of the same properly average the PSV out respecting Deenen criteria and producing nearly circular VGPs. We chose the average of all specimens as preferred dataset, since visually looks slightly closer to a circular shape, although that might solely be due to the extra number of points.

#### Sedimentary rocks

###### Nokkamappu fM (NE2, NE8 and NM)

We collected 150 samples in sedimentary succession that started with sandstones and siltstones (NE8 and NE2) and ended up in a conglomerate and sandstone series (NM) located below the pillow lavas (NM).

NE8 (43°22'30"N, 145°38'16"E)

37 samples were coded NE8, where the section begins. We identified a NW-down component that 4 and 60 mT and 200 ºC and 580 ºC typically goes to the origin. Several of the samples of this section show a gyroremanent magnetization (GRM5) from 40 mT. In those samples, no demagnetization step from 40 mT was considered.

NE2 (43°22'29"N, 145°38'21"E)

73 samples were coded NE2. We identified two components: (1) a NW-down (NE02-N) component that 4 and 60 mT and 200 ºC and 580 ºC typically goes to the origin. Some of the samples show intermediate components that could be fitted with remagnetization great circles6. And (2) 23 samples show a very elongated component NW to SE and up (NE02-R) with very high inclinations. The component follows a great circle between the well-defined NE02-N component and an antipodal component as found in NM locality. This component only passes the Deenen criteria after discarding a 20% of the samples through a 45º cut-off. However, the discarded samples are not clear outliers. Without the discarded directions k < 9 and A95 >> A95min (ST1). We have disregarded component NE02-R because of that. Several of the samples of this section show gyroremanent magnetization (GRM, c.f. Stephenson, 1993) from 40 mT.

NM (43°23'02"N, 145°38'42"E)

We took 50 samples in a matrix supported conglomerate coded (NM). From them, 9 samples were taken in conglomerate blocks (basaltic) and 41 in the sandy matrix and sandstone layers. In the sandstone samples we identified 2 antipodal components (NW-down and SE-up) that share a common direction (EDF 3). In the conglomerate blocks we obtained two components (cong-block#1 and cong-block#2). Cong-block#1 is of low coercivity/temperature. It does not concentrate (k < 5) and if under a 45º cut-off more samples are discarded than the ones that are preserved. The average direction is approximately vertical down and we think it represent a composite between a VRM and the ChRM of the block. Cong-block#2 goes to the origin from 17-20 mT and it is nearly random (k = 1.8).

We have evaluated through the elongation – inclination (E/I) method7 to assess the potential inclination shallowing that sedimentary rocks may show due to sedimentary and diagenetic processes. The dataset in Nokkamappu formation has suffered a significant flattening (factor = 0.53) and the original inclination (41.1º) became notably steeper (59.4º). We have used the corrected dataset for all further analyses. The differences between the obtained directions in the conglomerate blocks, and matrix and sedimentary layers together with the observed inclination shallowing in them, suggest a primary magnetization.

###### OTAMURA formation 1 (HN; 43º09'33"N, 145º06'30"E)

We collected 90 cores, one per bed, at HN locality. We could define a single polarity component NW directed and pointing down (HN-Sed-N). This component points to the origin and was isolated between 8 and 60 mT and 200 ºC and 580 ºC. We performed the E/I method7 to correct for potential inclination shallowing processes. We found an optimal inclination of 0.9, being the original inclination 50.4º and the corrected one 53.2º. Although the original inclination falls within the bootstrap confidence interval, we decided to use the corrected inclination for further analyses (EDF 4).

###### OTAMURA formation 2 (NE5; 43º20'16.8"N, 145º43'48"E)

We collected 7 samples from the Otamura formation. Cores were drilled perpendicular to the bedding planes, so each specimen represents different timespans. We analyzed 18 specimens. The component points up and to the SE. k is >120 and therefore we think it represents a single snapshot of the magnetic field. We think that this short sedimentary section might have been remagnetized during the intrusion of the sills since its inclination fits well with the nearby NE6 sill.

1. Naruse, H. Cretaceous to Paleocene depositional history of North-Pacific subduction zone: reconstruction from the Nemuro Group, eastern Hokkaido, northern Japan. *Cretaceous Research* **24**, 55–71 (2003).

2. Harisma, H., Naruse, H., Asanuma, H. & Hirata, T. The Origin of the Paleo-Kuril Arc, NE Japan: Sediment Provenance Change and Its Implications for Plate Configuration in the NW Pacific Region Since the Late Cretaceous. *Tectonics* **41**, e2022TC007299 (2022).

3. Yutani, T. *et al.* An intraoceanic juvenile arc of shoshonite and adakitic andesite in the Nemuro Belt, the Lesser Kuril Arc, across the K/Pg boundary. *Cretaceous Research* **147**, 105510 (2023).

4. Deenen, M. H. L., Langereis, C. G., van Hinsbergen, D. J. J. & Biggin, A. J. Geomagnetic secular variation and the statistics of palaeomagnetic directions. *Geophysical Journal International* **186**, 509–520 (2011).

5. Dankers, P. H. M. & Zijderveld, J. D. A. Alternating field demagnetization of rocks, and the problem of gyromagnetic remanence. *Earth and Planetary Science Letters* **53**, 89–92 (1981).

6. McFadden, P. L. L. & McElhinny, M. W. The combined analysis of remagnetization circles and direct observations in palaeomagnetism. *Earth and Planetary Science Letters* **87**, 161–172 (1988).

7. Tauxe, L. & Kent, D. V. A Simplified Statistical Model for the Geomagnetic Field and the Detection of Shallow Bias in Paleomagnetic Inclinations: was the Ancient Magnetic Field Dipolar? in *Timescales Of The Paleomagnetic Field* 101–115 (American Geophysical Union (AGU), 2004). doi:10.1029/145GM08.
