# Supplementary material
Source: Research Square preprint supplement (doi:10.21203/rs.3.rs-9503143/v1)
Supplement: Supplementary file 3 [file ac684cdf9fb323ae47acb14c.xlsx]

## Sheet: collection-means
GEOGRAPHIC																SITE	SITE
Collection	N	Ns	Cutoff	S	Dec	Inc	R	k	a95	K2	A953	A95Min	A95Max	ΔDx	ΔIx	Latitude	Longitude
HN.col - Sill-N	15	15	45	8.34	329.4	39.48	14.85	95.57	3.93	94.61	3.95	4.06	14.89	4.27	5.51	43.1592	145.108
HN.col - Sill-R	6	6	45	16.34	141.54	-50.68	5.87	37.46	11.09	25.01	13.66	5.86	26.52	16.06	15.06	43.1592	145.108
HN.col - Sed-N	86	89	45	13.99	333.78	33.64	83.04	28.72	2.9	34.13	2.65	2.02	4.96	2.79	4.08	43.1592	145.108
MRSill.col - N	10	11	45	24.67	15.26	57.13	9.47	17.07	12.04	11.09	15.18	4.78	19.22	19.33	14.3	43.1489	145.229
MRSill.col - R	2	2	45	5.8	172.21	-48.77	1.99	148.35	20.65	195.42	17.96	9.09	52.99	20.8	20.69	43.1489	145.229
NE1Lava.col - R	7	7	45	6.49	116.04	-49.56	6.96	167.49	4.68	156.19	4.84	5.51	24.07	5.62	5.48	43.3708	145.633
NE02-Circ.col - R-Lava	3	3	45	25.69	164.84	-64.49	2.92	23.89	25.8	10.1	41	7.73	41.04	71.83	31.91	43.3708	145.633
NE02-Circ.col - R-Sed	18	23	45	24.71	133.8	-62.73	17.14	19.66	8	11.01	10.91	3.78	13.27	15.29	8.89	43.3708	145.633
NE02-Circ.col - N-Sed	43	43	45	15.51	313.59	20.09	41.34	25.33	4.41	27.79	4.21	2.67	7.67	4.28	7.67	43.3708	145.633
NE02-NoCirc.col - R-Lava	3	3	45	25.69	164.84	-64.49	2.92	23.89	25.8	10.1	41	7.73	41.04	71.83	31.91	43.3708	145.633
NE02-NoCirc.col - R-Sed	18	23	45	24.71	133.8	-62.73	17.14	19.66	8	11.01	10.91	3.78	13.27	15.29	8.89	43.3708	145.633
NE02-NoCirc.col - N-Sed	12	12	45	12.4	321.51	24.56	11.73	41.49	6.82	42.92	6.7	4.44	17.14	6.87	11.67	43.3708	145.633
NE3.col - Lava-R	2	2	45	4.19	137.46	-56.62	2	701.05	9.45	373.31	12.96	9.09	52.99	16.35	12.37	43.2797	145.588
NE3.col - Sed-N	3	3	45	33.54	278.97	73.63	2.88	16.01	31.89	6	55.51	7.73	41.04	NaN	34.37	43.2797	145.588
NE3.col - Pillow-R	2	2	45	13.05	148.68	-38.63	1.95	20.87	57.75	38.66	41.32	9.09	52.99	45.32	58.48	43.2797	145.588
NE4Sill.col - N	1	1	45	NaN	332.6	24.06	1	0	NaN	NaN	NaN	12	82	NaN	NaN	43.3881	145.73
NE4Sill.col - R	1	1	45	NaN	168.29	-61.39	1	NaN	NaN	0	NaN	12	82	NaN	NaN	43.3881	145.73
NE5Sed.col - R	18	18	45	7.52	161.38	-46.43	17.86	121.05	3.15	116.34	3.22	3.78	13.27	3.64	3.9	43.388	145.73
NE6Sill.col - R	12	13	45	4.59	164.78	-39.54	11.96	295.04	2.53	311.5	2.46	4.44	17.14	2.66	3.43	43.3888	145.783
NE7-Sill.col - NE-7-Sill	8	8	45	15.99	336.91	56.41	7.86	49.52	7.95	26.17	11.03	5.22	22.12	13.86	10.58	43.3828	145.815
NE08.col - N	6	6	45	14.94	304.51	28.25	5.83	29.6	12.52	29.67	12.5	5.86	26.52	12.95	20.8	43.3755	145.638
NE08.col - N-Sed	25	25	45	14.25	304.63	22.17	23.82	20.27	6.59	32.63	5.15	3.31	10.79	5.25	9.19	43.3755	145.638
NE9Sill.col - N	5	5	45	9.26	339.27	58.48	4.96	113.76	7.2	76.87	8.78	6.3	29.75	11.36	7.99	43.3548	145.785
NE9Sill.col - R	2	2	45	33.01	106.55	-80.19	1.95	19.31	60.34	6.11	133.92	9.09	52.99	NaN	72.79	43.3548	145.785
NM.col - Pillow-R	54	56	45	16.99	133.08	-45.87	51.55	21.61	4.26	23.14	4.11	2.43	6.64	4.63	5.05	43.3841	145.644
NM.col - Pillow-N	3	6	45	20.5	235.13	37.58	2.91	21.4	27.34	15.79	32.12	7.73	41.04	34.73	46.32	43.3841	145.644
NM.col - Cong-mat-N	24	29	45	19.64	299.42	34.72	22.69	17.61	7.25	17.41	7.3	3.37	11.07	7.73	11.05	43.3841	145.644
NM.col - Cong-Block#1	3	7	45	29.21	233.02	47.03	2.81	10.4	40.33	7.86	47.29	7.73	41.04	56.5	56.6	43.3841	145.644
NM.col - Cong-Block#2	3	9	45	24.94	12.19	-17.55	2.54	4.39	67.75	10.7	39.72	7.73	41.04	40.31	74.01	43.3841	145.644
NM.col - Cong-mat-R	15	17	45	23.67	131.96	-20.69	13.54	9.6	13.02	12.02	11.51	4.06	14.89	11.71	20.85	43.3841	145.644
TILT CORRECTED
Collection	N	Ns	Cutoff	S	Dec	Inc	R	k	a95	K2	A953	A95Min	A95Max	ΔDx	ΔIx	Latitude	Longitude
HN.col - Sill-N	15	15	45	10.52	317.62	56.68	14.85	95.57	3.93	59.61	4.99	4.06	14.89	6.28	4.76	43.1592	145.108
HN.col - Sill-R	6	6	45	18.28	118.6	-65.2	5.87	37.46	11.09	19.99	15.36	5.86	26.52	22.96	11.73	43.1592	145.108
HN.col - Sed-N	84	89	45	15.67	325.28	51.05	81.47	32.77	2.74	27.12	3.02	2.04	5.03	3.55	3.3	43.1592	145.108
MRSill.col - N	9	11	45	26.77	18.78	71.95	8.63	21.36	11.4	9.44	17.67	4.98	20.54	33.77	11.38	43.1489	145.229
MRSill.col - R	2	2	45	8.99	163.93	-66.04	1.99	148.35	20.65	81.4	28.05	9.09	52.99	45.06	20.96	43.1489	145.229
NE1Lava.col - R	7	7	45	10.27	107.26	-73.17	6.96	167.49	4.68	62.45	7.7	5.51	24.07	15	4.82	43.3708	145.633
NE02-Circ.col - R-Lava	3	3	45	29.61	222.52	-79.11	2.92	23.89	25.8	7.64	48.06	7.73	41.04	NaN	26.61	43.3708	145.633
NE02-Circ.col - R-Sed	17	23	45	29.79	109.24	-86.33	16.34	24.15	7.41	7.64	13.82	3.86	13.76	NaN	6.99	43.3708	145.633
NE02-Circ.col - N-Sed	42	43	45	16.63	310.89	42.1	40.61	29.54	4.12	24.12	4.58	2.69	7.78	5.03	6.08	43.3708	145.633
NE02-NoCirc.col - R-Lava	3	3	45	29.61	222.52	-79.11	2.92	23.89	25.8	7.64	48.06	7.73	41.04	NaN	26.61	43.3708	145.633
NE02-NoCirc.col - R-Sed	17	23	45	29.79	109.24	-86.33	16.34	24.15	7.41	7.64	13.82	3.86	13.76	NaN	6.99	43.3708	145.633
NE02-NoCirc.col - N-Sed	12	12	45	15.19	322.32	46.53	11.73	41.49	6.82	28.68	8.24	4.44	17.14	9.33	9.97	43.3708	145.633
NE3.col - Lava-R	2	2	45	5.59	138.1	-76.62	2	701.05	9.45	209.94	17.32	9.09	52.99	43.87	10.05	43.2797	145.588
NE3.col - Sed-N	3	3	45	35	222.27	78.99	2.88	16.01	31.89	5.53	58.41	7.73	41.04	NaN	32.4	43.2797	145.588
NE3.col - Pillow-R	2	2	45	18.43	152.71	-55.23	1.95	20.87	57.75	19.42	60.15	9.09	52.99	NaN	59.41	43.2797	145.588
NE4Sill.col - N	1	1	45	NaN	321.05	36.37	1	0	NaN	NaN	NaN	12	82	NaN	NaN	43.3881	145.73
NE4Sill.col - R	1	1	45	NaN	117.06	-73.36	1	0	NaN	0	NaN	12	82	NaN	NaN	43.3881	145.73
NE5Sed.col - R	18	18	45	9.71	130.79	-61.71	17.86	121.05	3.15	69.89	4.16	3.78	13.27	5.69	3.49	43.388	145.73
NE6Sill.col - R	12	13	45	12.18	149.83	-61.32	11.87	84.08	4.76	44.63	6.57	4.44	17.14	8.92	5.55	43.3888	145.783
NE7-Sill.col - NE-7-Sill	8	8	45	21.21	359.64	79.1	7.86	49.52	7.95	15.09	14.73	5.22	22.12	45.05	8.16	43.3828	145.815
NE08.col - N	6	6	45	17.67	302.15	44.96	5.83	29.6	12.52	21.27	14.86	5.86	26.52	16.66	18.59	43.3755	145.638
NE08.col - N-Sed	25	25	45	16.73	302.82	38.9	23.82	20.27	6.59	23.74	6.07	3.31	10.79	6.55	8.55	43.3755	145.638
NE9Sill.col - N	5	5	45	12.5	0.01	71.56	4.96	113.76	7.2	42.24	11.91	6.3	29.75	21.83	7.74	43.3548	145.785
NE9Sill.col - R	2	2	45	34.14	344.26	-81.59	1.95	19.31	60.34	5.72	145.21	9.09	52.99	NaN	77.26	43.3548	145.785
NM.col - Pillow-R	53	56	45	19.01	111.38	-59.18	51.04	26.51	3.87	18.5	4.67	2.45	6.72	6.1	4.17	43.3841	145.644
NM.col - Pillow-N	4	6	45	30.09	231.14	36.76	3.64	8.3	33.94	7.48	36.01	6.89	34.24	38.87	52.67	43.3841	145.644
NM.col - Cong-mat-N	23	29	45	20.06	286.66	43.47	21.9	19.94	6.95	16.73	7.63	3.42	11.37	8.45	9.84	43.3841	145.644
NM.col - Cong-Block#1	5	7	45	34.67	182.12	48.17	4.43	6.99	31.14	5.64	35.34	6.3	29.75	41.5	41.24	43.3841	145.644
NM.col - Cong-Block#2	3	9	45	23.75	11.37	1.62	2.54	4.39	67.75	11.78	37.65	7.73	41.04	37.65	75.25	43.3841	145.644
NM.col - Cong-mat-R	14	17	45	24.19	121.32	-33.08	12.78	10.61	12.8	11.48	12.26	4.18	15.55	12.91	19.04	43.3841	145.644
