# Supplementary material
Source: Research Square preprint supplement (doi:10.21203/rs.3.rs-9503143/v1)
Supplement: Supplementary file 8 [file c73ef1d3748738725a861351.pdf]

# Extended data figure 4

## A) Bootstrapped E-I Pairs

### A-1 Otamura Fm.

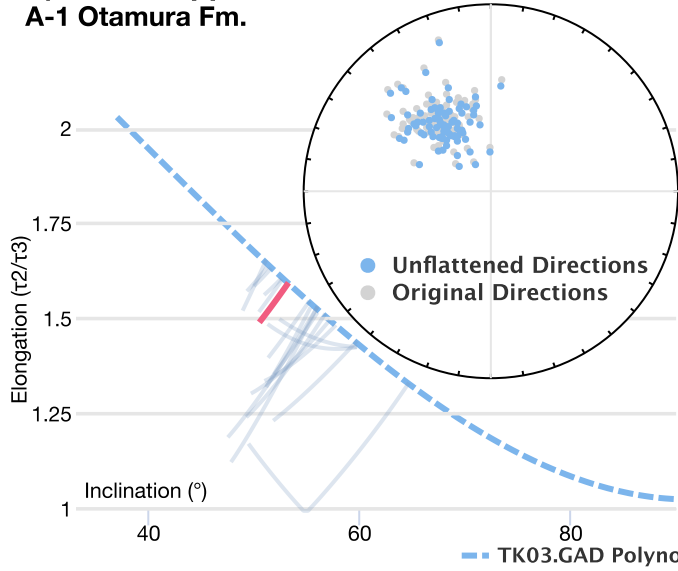

### A-2 Nokkamappu Fm.

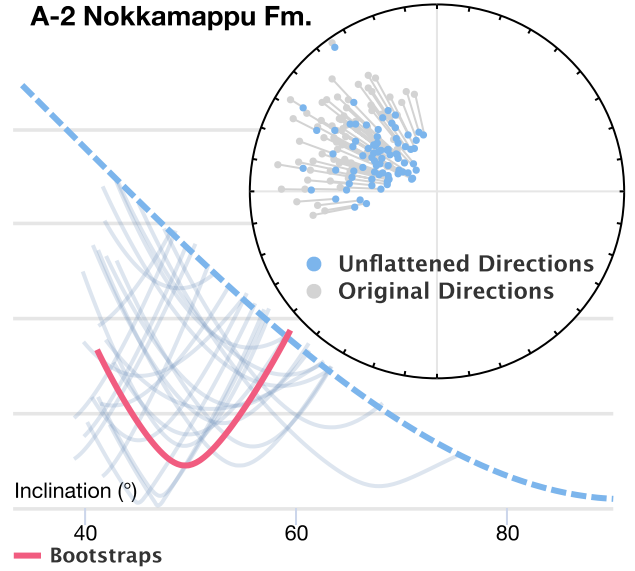

## B) Cumulative Distribution of bootstrapped TK03.GAD intersections

### B-1 Otamura Fm.

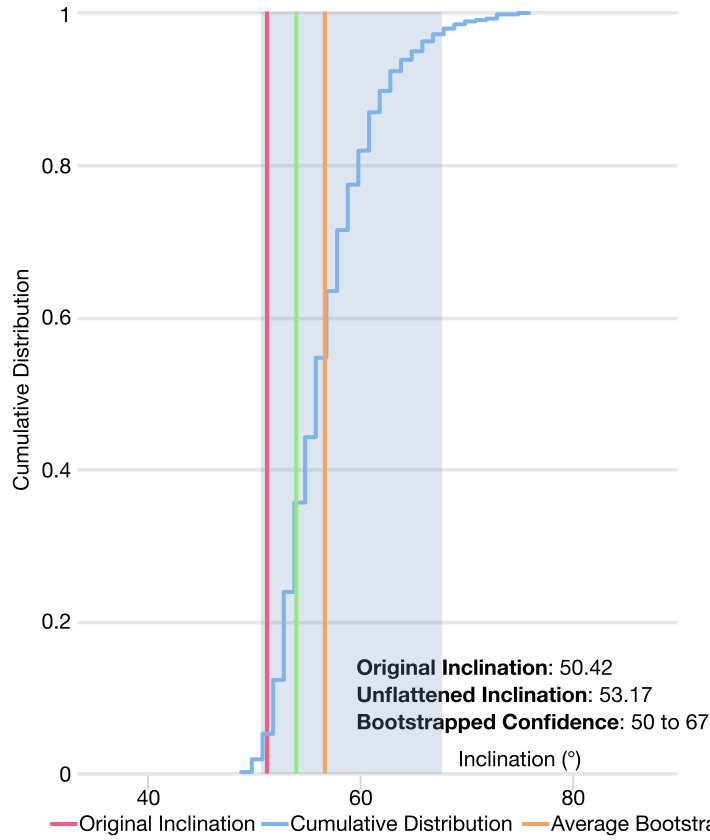

### B-2 Nokkamappu Fm.

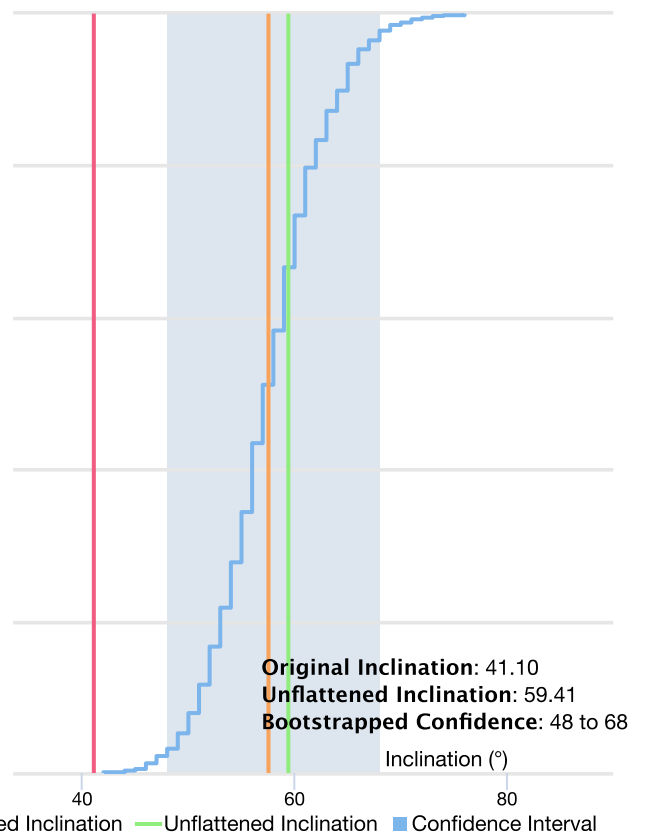

— Original Inclination — Cumulative Distribution — Average Bootstrapped Inclination — Unflattened Inclination ■ Confidence Interval
