# Supplementary material
Source: Research Square preprint supplement (doi:10.21203/rs.3.rs-9503143/v1)

# Extended data figure 3

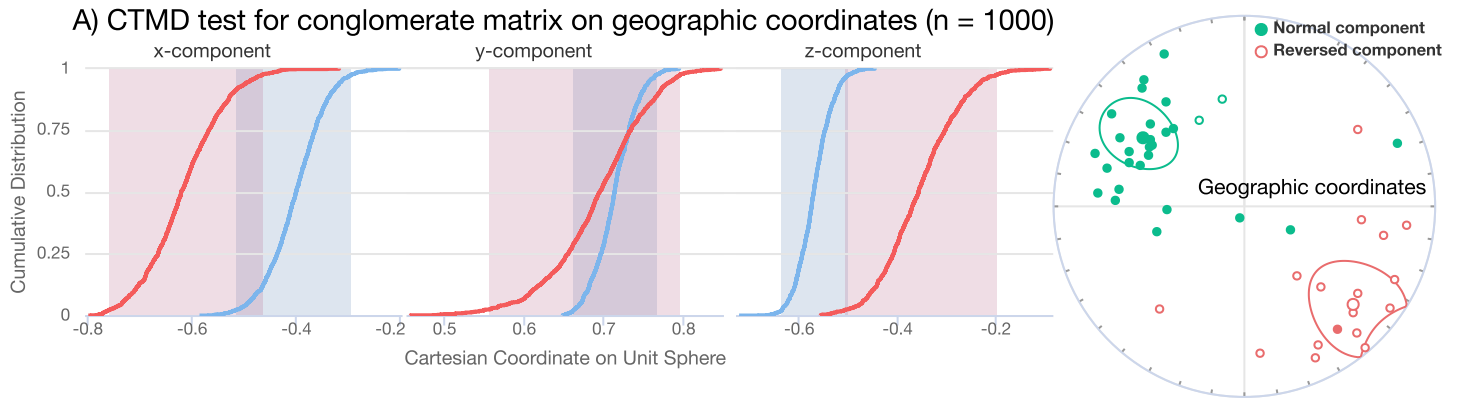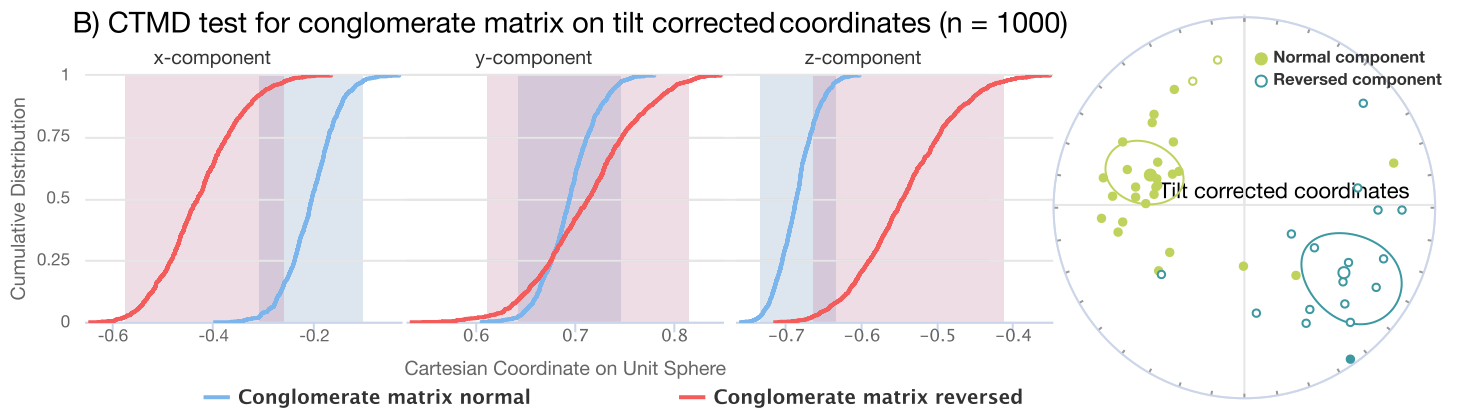

**C) Directions and VGP of conglomerate clasts**

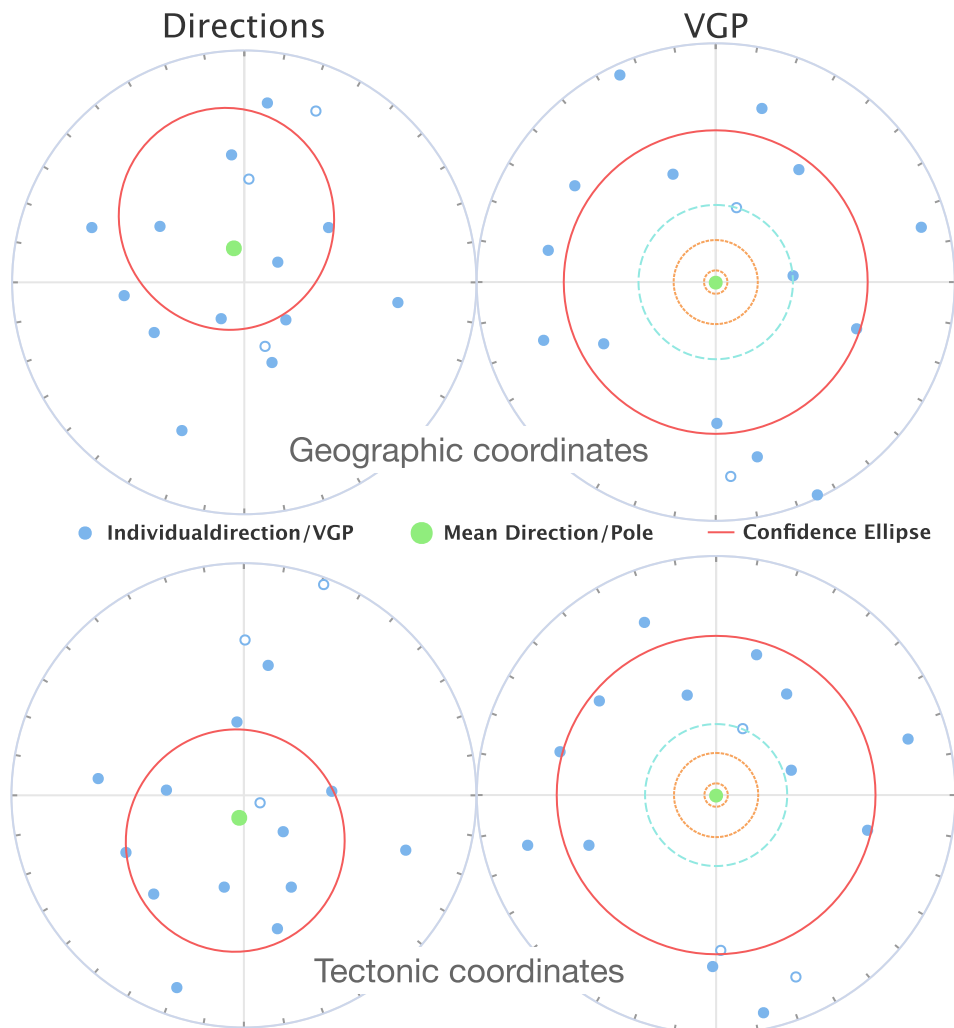

Supplement: Supplementary file 1 [file 2459eca892fd5bb5849e6f39.pdf]

# Extended data figure 2

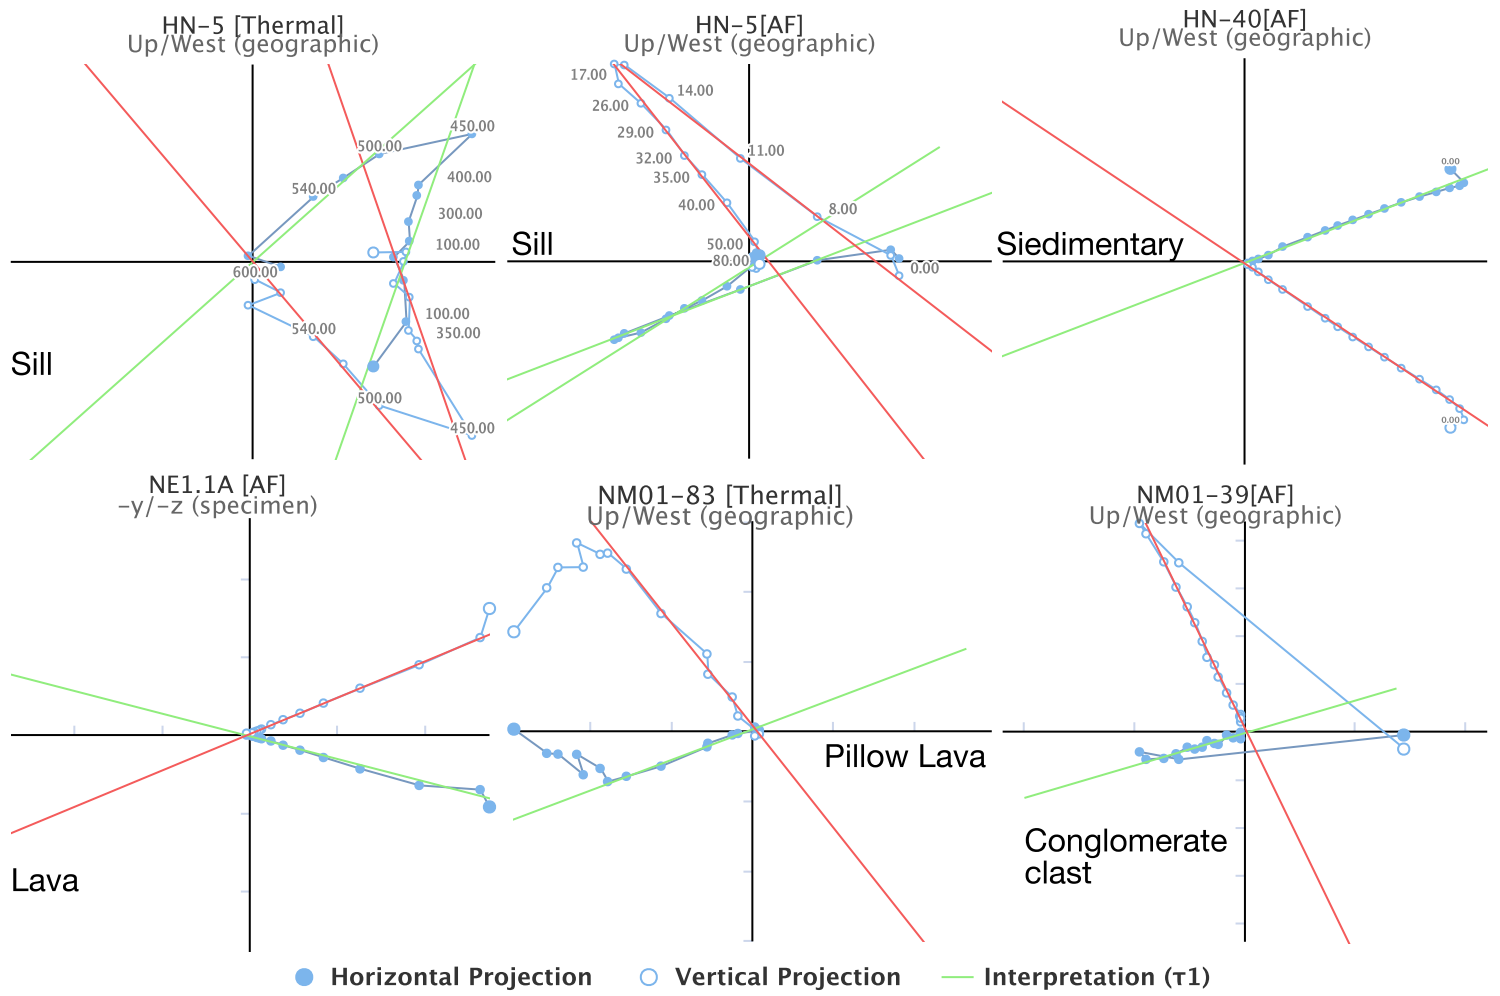

Supplement: Supplementary file 3 [file 5b235891b376b2bb4cf9d4a3.pdf]

Extended data figure 1

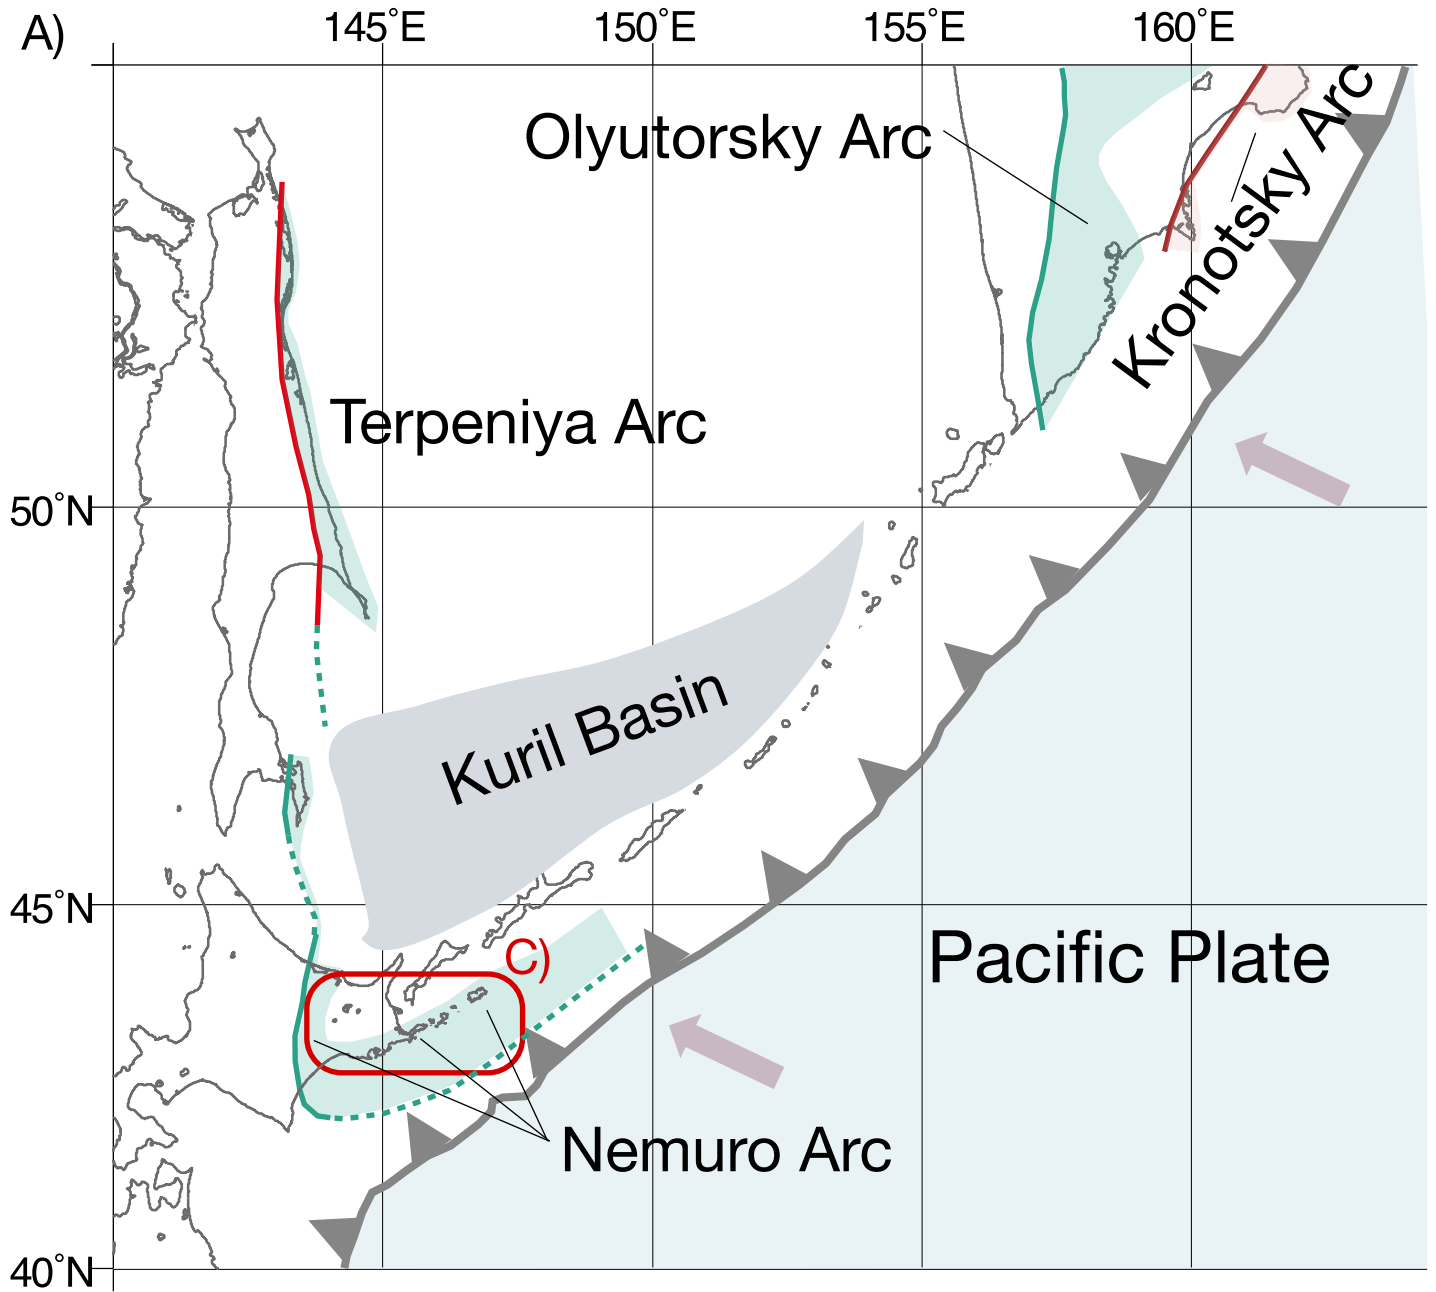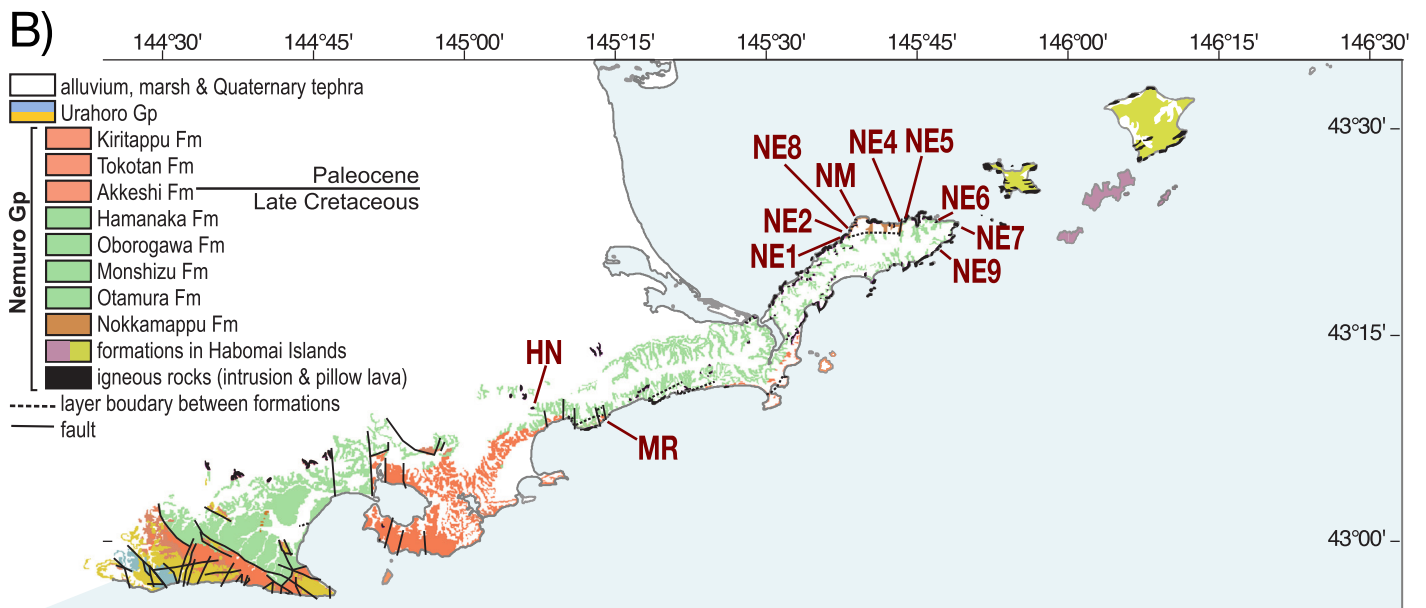

Supplement: Supplementary file 4 [file 71e30cd48b3e9302ae89ca6c.pdf]

Extended data figure 6

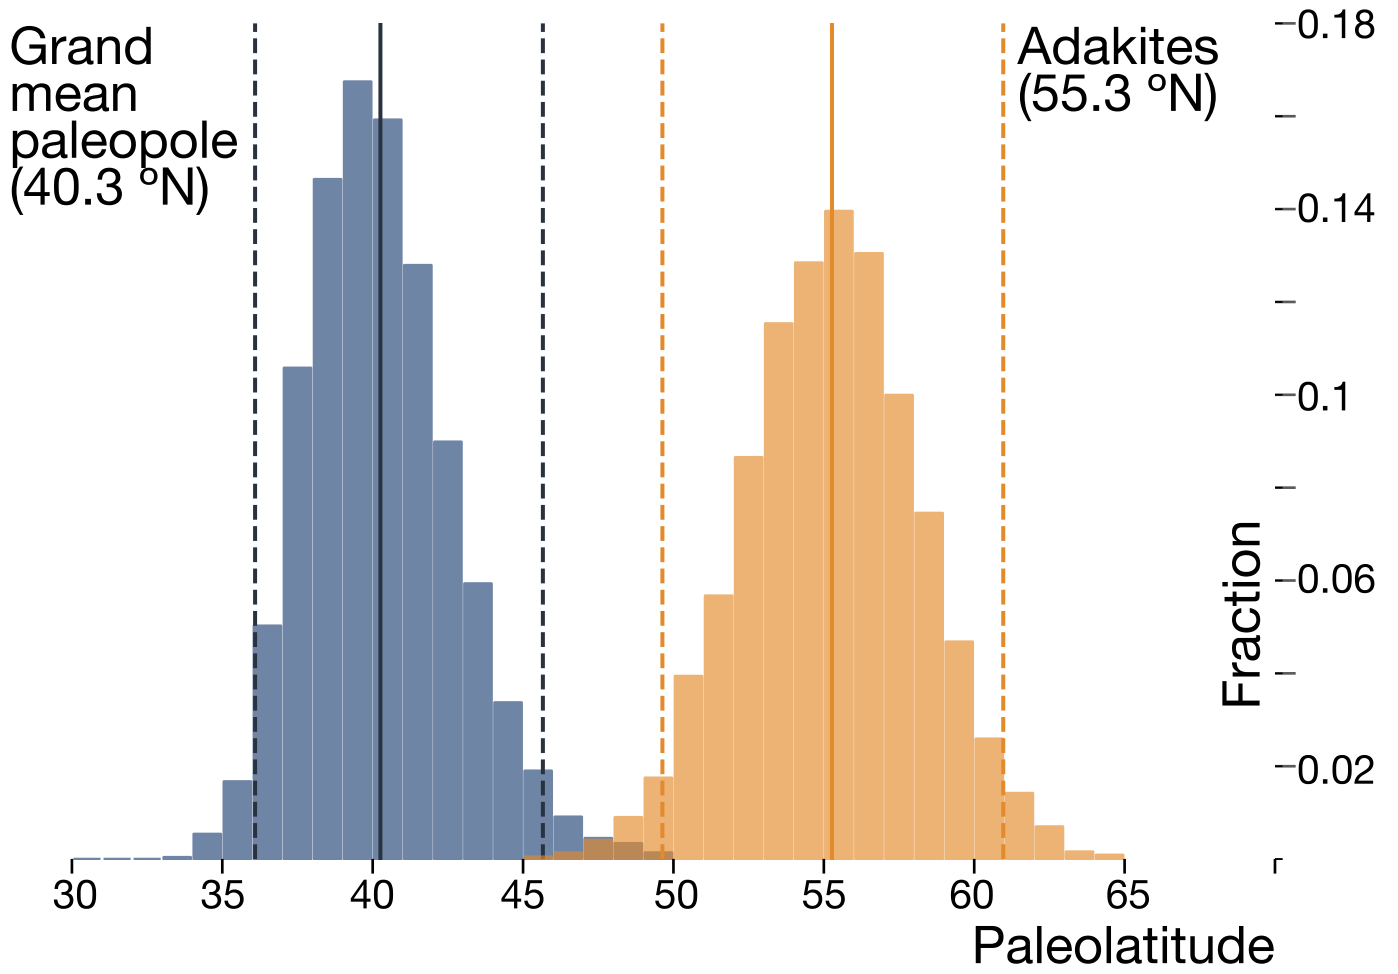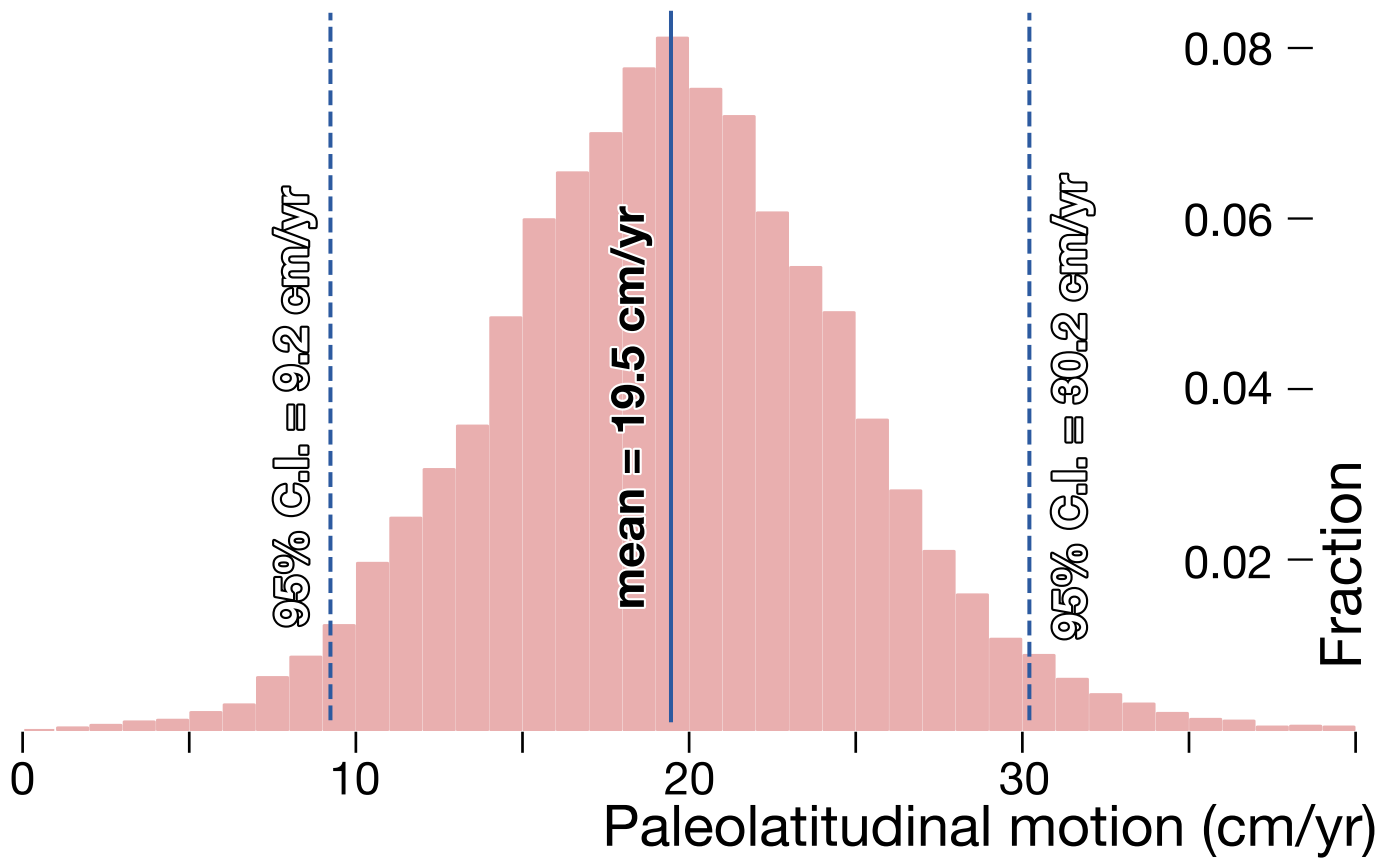

Supplement: Supplementary file 5 [file 90bd2acff8497a8a15eb998f.pdf]

# Extended data figure 7

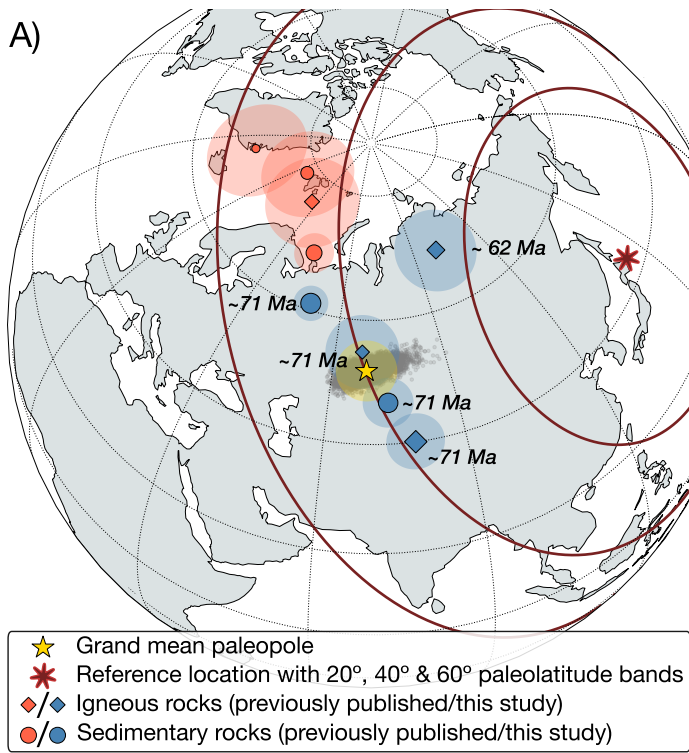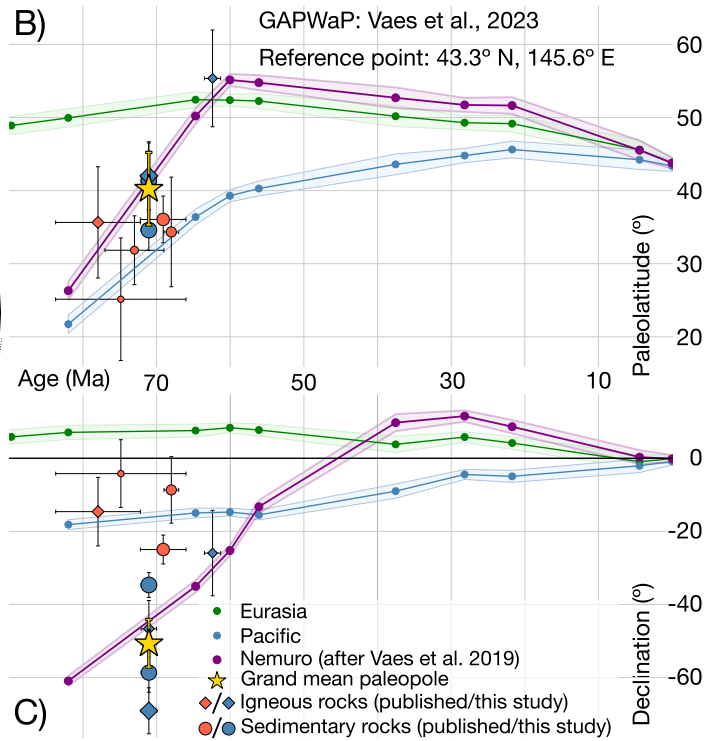

Supplement: Supplementary file 6 [file 966b5ed0ed65a09a655c4e31.pdf]

# Extended data figure 5

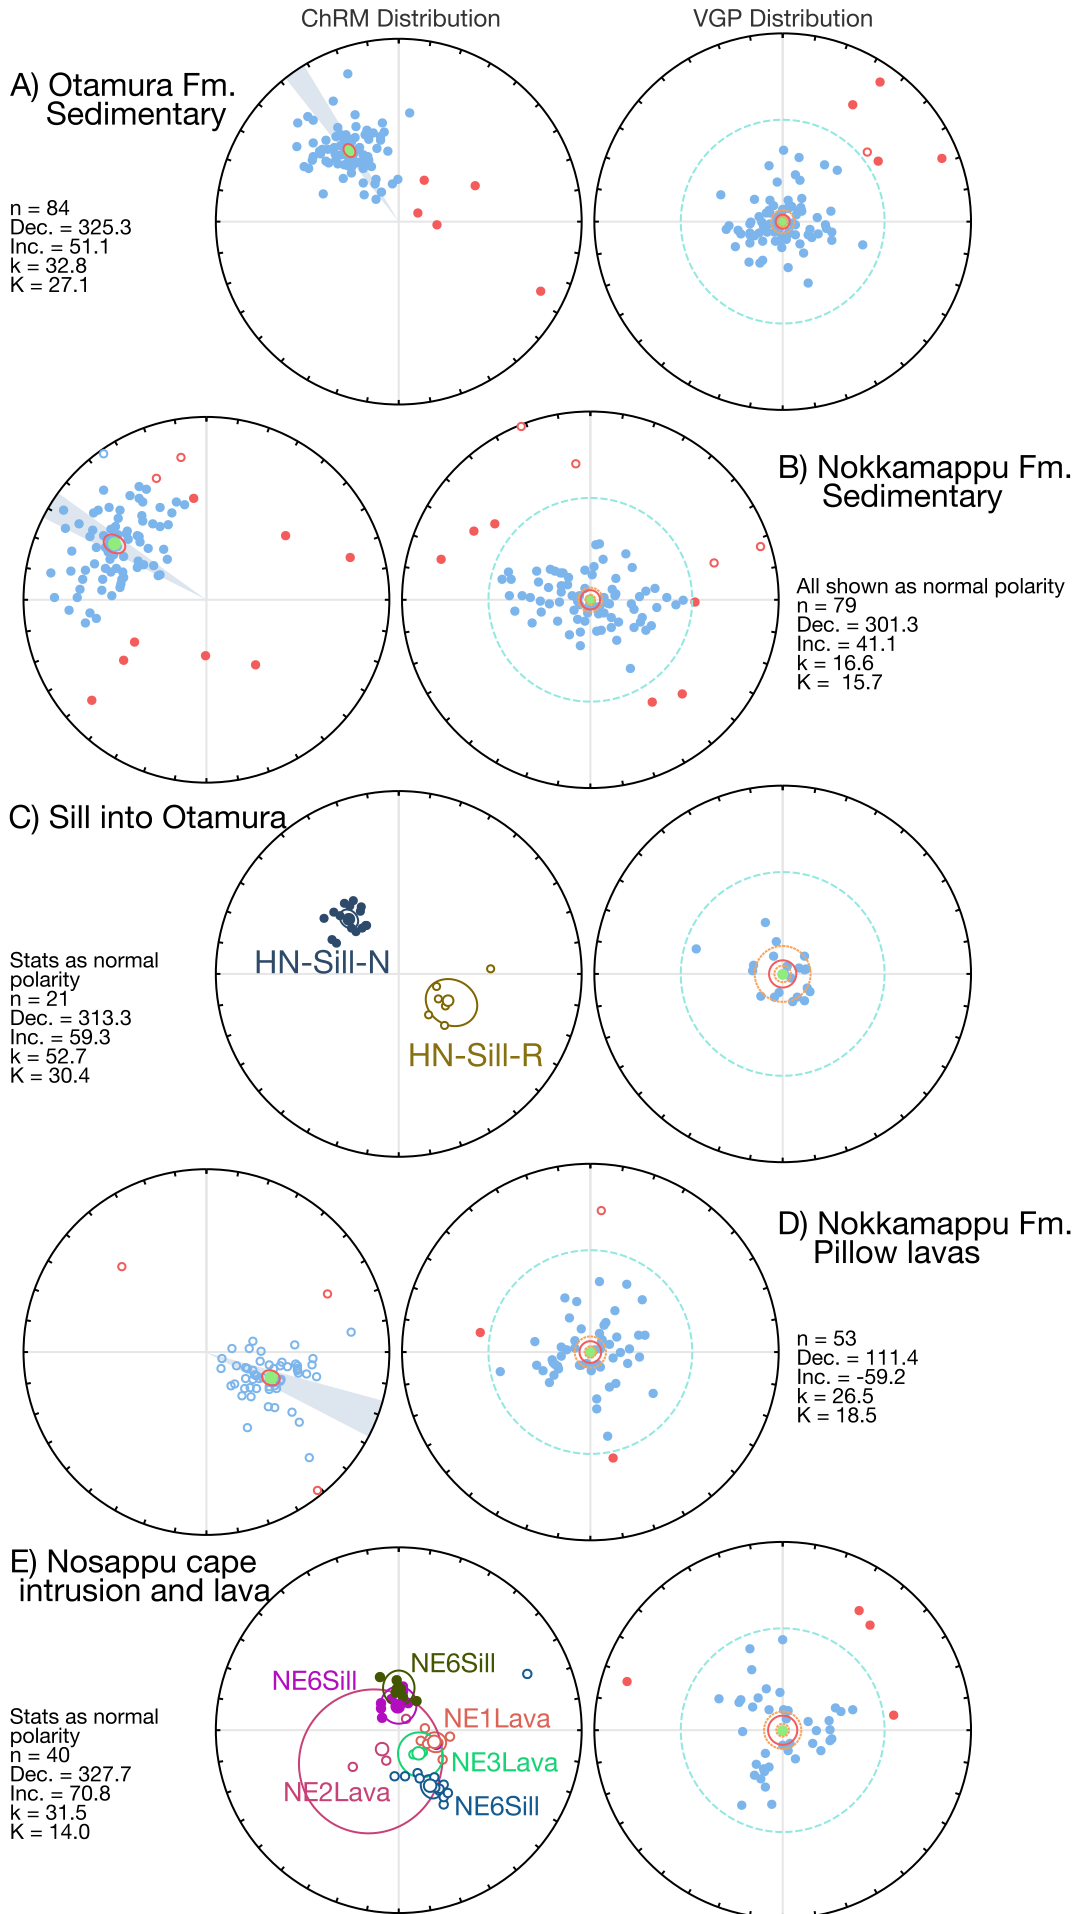

Supplement: Supplementary file 7 [file 9ad9588088d6e125dd83c204.pdf]
